# Supplementary material for: The formation mechanism of bimetallic PtRu alloy nanoparticles in solvothermal synthesis
Source: Royal Society of Chemistry journal article supplement (doi:10.1039/c5nr04459f), 2015-01-01
Supplement: c5nr04459f1.pdf [file c5nr04459f1.pdf]

Electronic Supplementary Information (ESI) for  
**Formation mechanism of bimetallic PtRu alloy nanoparticles in  
solvothermal synthesis†**

**Jian-Li Mi,<sup>\*a</sup> Peter Nørby,<sup>b</sup> Martin Bremholm,<sup>b</sup> Jacob Becker<sup>b</sup> and Bo B. Iversen<sup>\*b</sup>**

*<sup>a</sup>Institute for Advanced Materials, School of Materials Science and Engineering, Jiangsu University, Zhenjiang 212013, China. Email: [jlmi@ujs.edu.cn](mailto:jlmi@ujs.edu.cn)*

*<sup>b</sup>Center for Materials Crystallography, Department of Chemistry and iNANO, Aarhus University, 8000 Aarhus C, Denmark. Email: [bo@chem.au.dk](mailto:bo@chem.au.dk)*

## **1. Experimental**

For the preparation of bimetallic PtRu nanoparticles, ruthenium acetylacetonate ( $\text{Ru}(\text{acac})_3$ ) and platinum acetylacetonate ( $\text{Pt}(\text{acac})_2$ ) were used as precursors, and ethanol was used as both solvent and reducing agent. A relatively high concentration of precursor solution improves the quality of diffraction data. As a result, ethanol solutions of 0.25 M  $\text{Ru}(\text{acac})_3$  and 0.25 M  $\text{Pt}(\text{acac})_2$  were prepared. The above two solutions were mixed with the volume ratio of 1:1.

A custom-designed high-pressure flow cell with a sapphire capillary was used for the real-time probing of synchrotron radiation powder X-ray diffraction (SR-PXRD).<sup>1</sup> After injecting the precursor solution, the sapphire capillary is sealed, pressurized and subsequently heated to the targeted temperature using a HPLC pump and a hot air flow, respectively. The experiment was performed at a temperature of 200 °C and under a

pressure of 25 MPa. The *in situ* SR-PXRD data were measured at beam line I711, at MAX-lab, Sweden, using monochromatic X-rays with a wavelength of 1.0009 Å. The data was collected on a Mar 165 CCD detector. The measurements were performed with a time resolution of 5 s between each frame, of which 1 s was the detector readout.

## 2. Rietveld refinements

The raw data images were integrated using FIT2D,<sup>2</sup> which reduces the data to standard 1 D PXRD data. The time-resolved SR-PXRD data were Rietveld refined using the FullProf program<sup>3</sup>. In order to carry out precise size analysis, the data were corrected for instrumental broadening using a LaB6 standard (NIST SRM 660a). **Fig. S1** is a typical refinement of *in situ* SR-PXRD data with observed, calculated and difference patterns for PtRu nanoparticles at the reaction time of 10 min showing a good agreement with the observed pattern. **Table S1** displays selected refinement parameters for the *in situ* PXRD data at the reaction time of 10 s, 15 s, 2 min and 10 min, respectively.

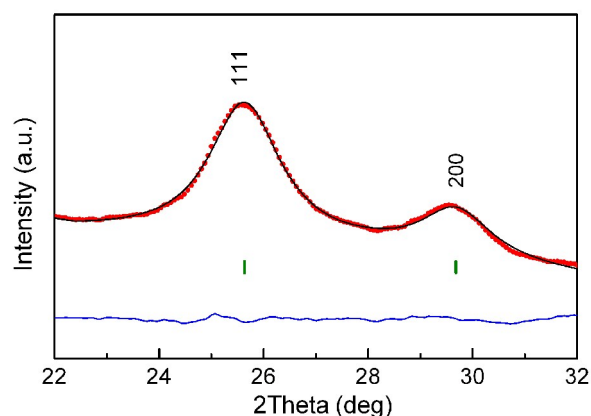

**Fig. S1** Observed (red), calculated (black), and difference (blue) patterns of selected *in situ* SR-PXRD data at the reaction time of 10 min.

**Table S1.** Refined parameters of the SR-PXRD data at reaction time of 10 s, 15 s, 2 min and 10 min. The data in the range of  $22^\circ < 2\theta < 32^\circ$  are included in the refinement.

| Reaction time      | 10 s      | 15 s      | 2 min     | 10 min    |
|--------------------|-----------|-----------|-----------|-----------|
| Data points        | 595       | 595       | 595       | 595       |
| Reflections        | 2         | 2         | 2         | 2         |
| $R_{WP}$ (%)       | 3.76      | 2.36      | 3.03      | 2.36      |
| $R_1$ (%)          | 0.639     | 1.02      | 1.99      | 1.75      |
| $R_F$ (%)          | 0.392     | 0.658     | 1.36      | 1.05      |
| $a$ (Å)            | 3.9304(2) | 3.9312(2) | 3.8978(2) | 3.9084(2) |
| Particle size (nm) | 4.1(1)    | 4.9(1)    | 3.2(1)    | 3.0(1)    |

### 3. Two step mechanism fit of the scale factor

It was proposed a two-step mechanism for transition-metal nanocluster formation, including nucleation ( $A \rightarrow B$ , rate constant  $k_1$ ) and autocatalytic growth ( $A + B \rightarrow 2B$ , rate constant  $k_2$ ), in which A represents the precursor and B represents the growing nanocluster.<sup>4,5</sup> The rate constants  $k_1$  is inversely proportional to the length of the induction period during which the nucleation occurs and  $k_2$  is proportional to the normalized slope of the linear part of the curve after the induction period.

$$[A]_t = \frac{\frac{k_1}{k_2} + [A]_0}{1 + \frac{k_1}{k_2[A]_0} * \exp(k_1 + k_2[A]_0)t} \quad (S1)$$

In the present study, however, the scale factor ( $\alpha$ ) of PtRu nanoparticles is obtained. Here, by assuming  $[A]_t = 1 - \alpha$  and  $[A]_0 = 1$ , as shown in **Fig. S2**, a reasonable fit of kinetic curve with  $k_1 = 2.2(5) \text{ min}^{-1}$  and  $k_2 = 0.7(2) \text{ min}^{-1}$  is obtained for the two-step mechanism.

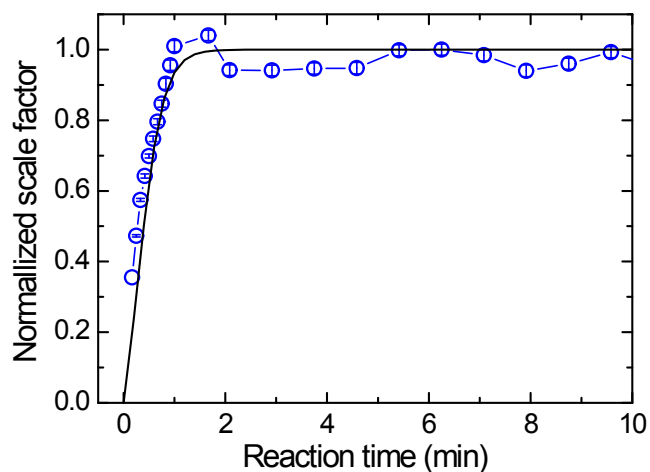

**Fig. S2** Time evolution of normalized scale factor and the fit using two-step mechanism to the formation curve.

## References

- 1 J. Becker, M. Bremholm, C. Tyrsted, B. Pauw, K. M. Ø. Jensen, J. Eltzholt, M. Christensen and B. B. Iversen, *J. Appl. Cryst.*, 2010, **43**, 729-736.
- 2 A. P. Hammersley, S. O. Svensson, M. Hanfland, A. N. Fitch and D. Hausermann, *High Pressure Res.*, 1996, **14**, 235-248.
- 3 J. Rodriguez-Carvajal, *Physica B*, 1993, **192**, 55-69.
- 4 M. A. Watzky and R. G. Finke, *J. Am. Chem. Soc.* 1997, **119**, 10382-10400.
- 5 M. A. Watzky, E. E. Finney and R. G. Finke, *J. Am. Chem. Soc.* 2008, **130**, 11959-11969.
